# Supplementary material for: A series of novel phosphites/phosphates with deep-ultraviolet cut-off edges from 0D polar to 3D non-polar architectures
Source: Royal Society of Chemistry journal article supplement (doi:10.1039/d3ce00464c), 2023-01-01
Supplement: d3ce00464c1.pdf [file d3ce00464c1.pdf]

## Supporting Information

### Contents

**Figure S1:** EDX and SEM images of  $\text{Al}[\text{P}_2\text{O}_3(\text{OH})_3](\text{H}_2\text{O})$ .

**Figure S2:** EDX and SEM images of  $\text{Al}[(\text{HPO}_3)(\text{OH})(\text{H}_2\text{O})]$ .

**Figure S3:** EDX and SEM images of  $\text{Ca}[\text{HPO}_3]$ .

**Figure S4:** EDX and SEM images of  $\text{Al}_3\text{P}_6\text{O}_{19.5}$ .

**Figure S5:** Experimental (black) and simulated (red) PXRD of  $\text{Al}[\text{P}_2\text{O}_3(\text{OH})_3](\text{H}_2\text{O})$  (a),  $\text{Al}[(\text{HPO}_3)(\text{OH})(\text{H}_2\text{O})]$  (b),  $\text{Ca}[\text{HPO}_3]$  (c) and  $\text{Al}_3\text{P}_6\text{O}_{19.5}$  (d).

**Table S1.** Important Bond Lengths (angstroms) and Important Bond Angles (degrees) for  $\text{Al}[\text{P}_2\text{O}_3(\text{OH})_3](\text{H}_2\text{O})$  (a),  $\text{Al}[(\text{HPO}_3)(\text{OH})(\text{H}_2\text{O})]$  (b),  $\text{Ca}[\text{HPO}_3]$  (c) and  $\text{Al}_3\text{P}_6\text{O}_{19.5}$  (d).

**Figure S6:** TG-DSC curves of  $\text{Al}[\text{P}_2\text{O}_3(\text{OH})_3](\text{H}_2\text{O})$  (a),  $\text{Al}[(\text{HPO}_3)(\text{OH})(\text{H}_2\text{O})]$  (b),  $\text{Ca}[\text{HPO}_3]$  (c) and  $\text{Al}_3\text{P}_6\text{O}_{19.5}$  (d).

**Figure S7:** IR spectra of  $\text{Al}[\text{P}_2\text{O}_3(\text{OH})_3](\text{H}_2\text{O})$  (a),  $\text{Al}[(\text{HPO}_3)(\text{OH})(\text{H}_2\text{O})]$  (b),  $\text{Ca}[\text{HPO}_3]$  (c) and  $\text{Al}_3\text{P}_6\text{O}_{19.5}$  (d).

**Figure S8:** Raman spectra of  $\text{Al}[\text{P}_2\text{O}_3(\text{OH})_3](\text{H}_2\text{O})$  (a),  $\text{Al}[(\text{HPO}_3)(\text{OH})(\text{H}_2\text{O})]$  (b),  $\text{Ca}[\text{HPO}_3]$  (c) and  $\text{Al}_3\text{P}_6\text{O}_{19.5}$  (d).

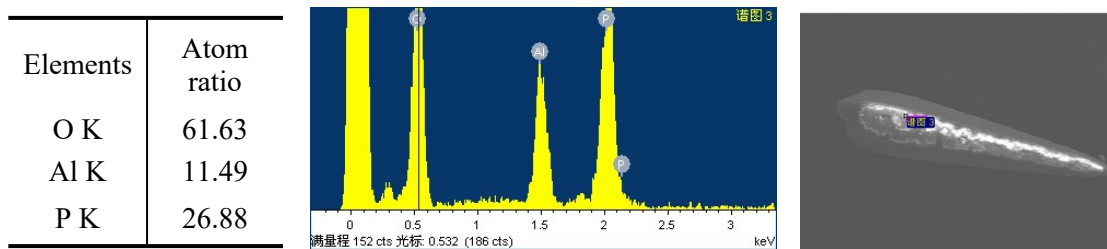

Figure S1: EDX and SEM image of  $\text{Al}[\text{P}_2\text{O}_3(\text{OH})_3](\text{H}_2\text{O})$ .

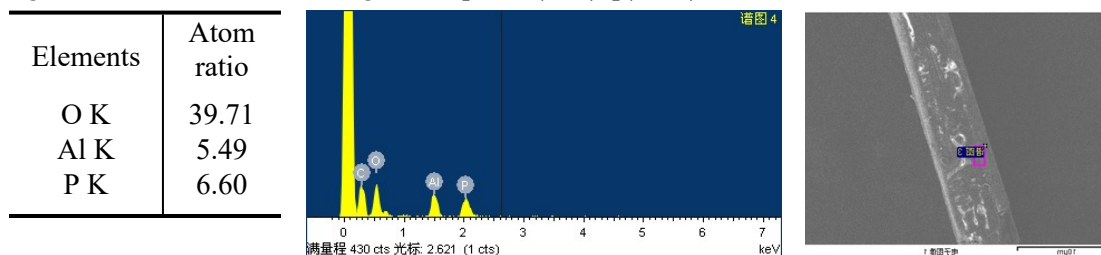

Figure S2: EDX and SEM image of  $\text{Al}[(\text{HPO}_3)(\text{OH})(\text{H}_2\text{O})]$ .

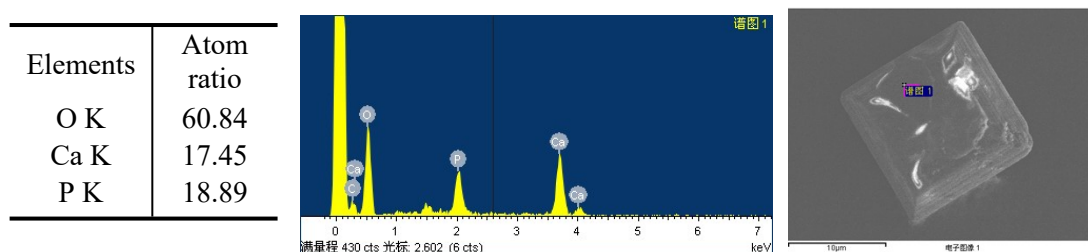

Figure S3: EDX and SEM image of  $\text{Ca}[\text{HPO}_3]$ .

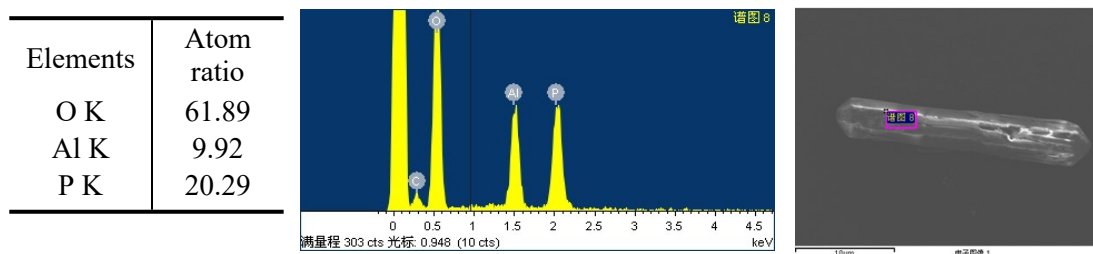

Figure S4: EDX and SEM image of  $\text{Al}_3\text{P}_6\text{O}_{19.5}$ .

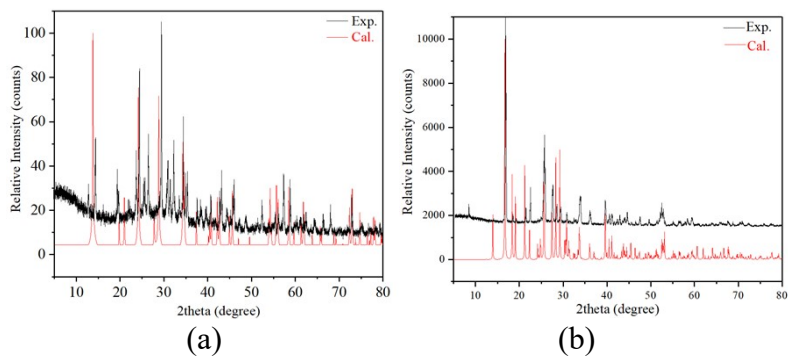

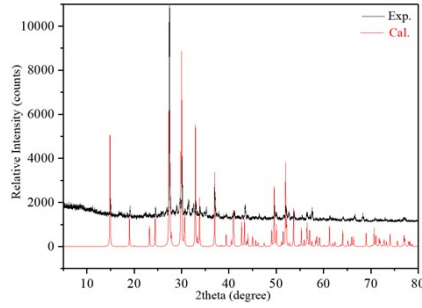

(c)

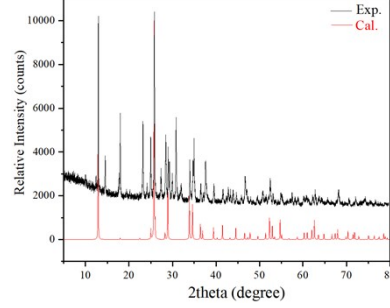

(d)

**Figure S5:** Experimental (black) and simulated (red) **PXRD** of  $\text{Al}[\text{P}_2\text{O}_3(\text{OH})_3](\text{H}_2\text{O})$  (a),  $\text{Al}[(\text{HPO}_3)(\text{OH})](\text{H}_2\text{O})$  (b),  $\text{Ca}[\text{HPO}_3]$  (c) and  $\text{Al}_3\text{P}_6\text{O}_{19.5}$  (d).

**Table S1. Important Bond Lengths (angstroms) and Important Bond Angles (degrees) for  $\text{Al}[\text{P}_2\text{O}_3(\text{OH})_3](\text{H}_2\text{O})$ ,  $\text{Al}[(\text{HPO}_3)(\text{OH})](\text{H}_2\text{O})$ ,  $\text{Ca}[\text{HPO}_3]$  and  $\text{Al}_4\text{P}_6\text{O}_{21}$ .**

| $\text{Al}[\text{P}_2\text{O}_3(\text{OH})_3](\text{H}_2\text{O})$ |           | $\text{Al}[(\text{HPO}_3)(\text{OH})](\text{H}_2\text{O})$ |           |
|--------------------------------------------------------------------|-----------|------------------------------------------------------------|-----------|
| P(1)-O(2)#1                                                        | 1.514(5)  | P(1)-O(8)                                                  | 1.51(2)   |
| P(1)-O(2)#2                                                        | 1.514(5)  | P(1)-O(1)                                                  | 1.55(2)   |
| P(1)-O(2)                                                          | 1.514(5)  | P(1)-O(9)                                                  | 1.56(2)   |
| P(2)-O(1)                                                          | 1.535(5)  | P(2)-O(10)                                                 | 1.50(2)   |
| P(2)-O(1)#3                                                        | 1.535(5)  | P(2)-O(7)                                                  | 1.52(3)   |
| P(2)-O(1)#4                                                        | 1.535(5)  | P(2)-O(3)                                                  | 1.54(3)   |
| Al(1)-O(2)#5                                                       | 1.896(6)  | Al(1)-O(4)#1                                               | 1.77(2)   |
| Al(1)-O(2)#6                                                       | 1.896(6)  | Al(1)-O(4)                                                 | 1.77(2)   |
| Al(1)-O(2)#7                                                       | 1.896(6)  | Al(1)-O(3)                                                 | 1.82(2)   |
| Al(1)-O(1)#4                                                       | 1.901(5)  | Al(1)-O(3)#1                                               | 1.82(2)   |
| Al(1)-O(1)#8                                                       | 1.901(5)  | Al(1)-O(6)#1                                               | 1.92(2)   |
| Al(1)-O(1)#9                                                       | 1.901(5)  | Al(1)-O(6)                                                 | 1.92(2)   |
| O(1)-Al(1)#10                                                      | 1.904(5)  | Al(2)-O(2)                                                 | 1.794(18) |
| O(2)-Al(1)#11                                                      | 1.896(6)  | Al(2)-O(2)#2                                               | 1.794(18) |
|                                                                    |           | Al(2)-O(9)                                                 | 1.82(2)   |
| O(2)#1-P(1)-O(2)#2                                                 | 113.0(2)  | Al(2)-O(9)#2                                               | 1.82(2)   |
| O(2)#1-P(1)-O(2)                                                   | 113.0(2)  | Al(2)-O(5)                                                 | 1.91(3)   |
| O(2)#2-P(1)-O(2)                                                   | 113.0(2)  | Al(2)-O(5)#2                                               | 1.91(3)   |
| O(1)-P(2)-O(1)#3                                                   | 110.5(2)  | Al(3)-O(2)#3                                               | 1.825(18) |
| O(1)-P(2)-O(1)#4                                                   | 110.5(2)  | Al(3)-O(2)                                                 | 1.825(18) |
| O(1)#3-P(2)-O(1)#4                                                 | 110.5(2)  | Al(3)-O(7)                                                 | 1.85(3)   |
| O(2)#5-Al(1)-O(2)#6                                                | 88.9(3)   | Al(3)-O(7)#3                                               | 1.85(3)   |
| O(2)#5-Al(1)-O(2)#7                                                | 88.9(3)   | Al(3)-O(1)#3                                               | 1.85(2)   |
| O(2)#6-Al(1)-O(2)#7                                                | 88.9(3)   | Al(3)-O(1)                                                 | 1.85(2)   |
| O(2)#5-Al(1)-O(1)#4                                                | 91.15(15) | Al(4)-O(10)#4                                              | 1.80(3)   |
| O(2)#6-Al(1)-O(1)#4                                                | 91.15(15) | Al(4)-O(10)#5                                              | 1.80(3)   |
| O(2)#7-Al(1)-O(1)#4                                                | 179.9(3)  | Al(4)-O(4)#5                                               | 1.83(2)   |
| O(2)#5-Al(1)-O(1)#8                                                | 179.9(3)  | Al(4)-O(4)#4                                               | 1.83(2)   |
| O(2)#6-Al(1)-O(1)#8                                                | 91.15(15) | Al(4)-O(8)#6                                               | 1.86(2)   |
| O(2)#7-Al(1)-O(1)#8                                                | 91.15(15) | Al(4)-O(8)                                                 | 1.86(2)   |
| O(1)#4-Al(1)-O(1)#8                                                | 88.8(2)   | O(4)-Al(4)#7                                               | 1.83(2)   |
| O(2)#5-Al(1)-O(1)#9                                                | 91.15(15) | O(10)-Al(4)#7                                              | 1.80(3)   |
| O(2)#6-Al(1)-O(1)#9                                                | 179.9(3)  |                                                            |           |
| O(2)#7-Al(1)-O(1)#9                                                | 91.15(15) | O(8)-P(1)-O(1)                                             | 112.8(12) |
| O(1)#4-Al(1)-O(1)#9                                                | 88.8(2)   | O(8)-P(1)-O(9)                                             | 112.4(15) |
| O(1)#8-Al(1)-O(1)#9                                                | 88.8(2)   | O(1)-P(1)-O(9)                                             | 110.1(12) |
|                                                                    |           | O(10)-P(2)-O(7)                                            | 110.7(14) |
|                                                                    |           | O(10)-P(2)-O(3)                                            | 108.8(15) |
|                                                                    |           | O(7)-P(2)-O(3)                                             | 109.4(15) |
|                                                                    |           | O(4)#1-Al(1)-O(4)                                          | 180.0     |

|                       |          |                                                  |           |
|-----------------------|----------|--------------------------------------------------|-----------|
|                       |          | O(4)#1-Al(1)-O(3)                                | 89.7(11)  |
|                       |          | O(4)-Al(1)-O(3)                                  | 90.3(11)  |
|                       |          | O(4)#1-Al(1)-O(3)#1                              | 90.3(11)  |
|                       |          | O(4)-Al(1)-O(3)#1                                | 89.7(11)  |
|                       |          | O(3)-Al(1)-O(3)#1                                | 180.0     |
|                       |          | O(4)#1-Al(1)-O(6)#1                              | 92.0(11)  |
|                       |          | O(4)-Al(1)-O(6)#1                                | 88.0(11)  |
|                       |          | O(3)-Al(1)-O(6)#1                                | 91.7(13)  |
|                       |          | O(3)#1-Al(1)-O(6)#1                              | 88.3(13)  |
|                       |          | O(4)#1-Al(1)-O(6)                                | 88.0(11)  |
|                       |          | O(4)-Al(1)-O(6)                                  | 92.0(11)  |
|                       |          | O(3)-Al(1)-O(6)                                  | 88.3(13)  |
|                       |          | O(3)#1-Al(1)-O(6)                                | 91.7(13)  |
|                       |          | O(6)#1-Al(1)-O(6)                                | 180.0     |
|                       |          | O(2)-Al(2)-O(2)#2                                | 180.0(10) |
|                       |          | O(2)-Al(2)-O(9)                                  | 91.0(10)  |
|                       |          | O(2)#2 -Al(2)-O(9)                               | 89.0(10)  |
|                       |          | O(2) -Al(2)-O(9)#2                               | 89.0(10)  |
|                       |          | O(2) #2-Al(2)-O(9)#2                             | 91.0(10)  |
|                       |          | O(9)-Al(2)-O(9)#2                                | 180.0     |
|                       |          | O(2)-Al(2)-O(5)                                  | 90.0(10)  |
|                       |          | O(2)#2-Al(2)-O(5)                                | 90.0(10)  |
|                       |          | O(9)-Al(2)-O(5)                                  | 89.0(12)  |
|                       |          | O(9)#2-Al(2)-O(5)                                | 91.0(12)  |
|                       |          | O(2)-Al(2)-O(5)#2                                | 90.0(10)  |
|                       |          | O(2)#2-Al(2)-O(5)#2                              | 90.0(10)  |
|                       |          | O(9)-Al(2)-O(5)#2                                | 91.0(12)  |
|                       |          | O(9)#2-Al(2)-O(5)#2                              | 89.0(12)  |
|                       |          | O(5)-Al(2)-O(5)                                  | 180.0     |
|                       |          | O(2)#3-Al(3)-O(2)                                | 180.0     |
|                       |          | O(2)#3-Al(3)-O(7)                                | 87.9(11)  |
|                       |          | O(2)-Al(3)-O(7)                                  | 92.1(11)  |
|                       |          | O(2)#3-Al(3)-O(7)#3                              | 92.1(11)  |
|                       |          | O(2)-Al(3)-O(7)#3                                | 87.9(11)  |
|                       |          | O(7)-Al(3)-O(7)#3                                | 180.0     |
|                       |          | O(2)#3-Al(3)-O(1)#3                              | 92.7(9)   |
|                       |          | O(2)-Al(3)-O(1)#3                                | 87.3(9)   |
|                       |          | O(7)-Al(3)-O(1)#3                                | 90.3(10)  |
|                       |          | O(7)#3-Al(3)-O(1)#3                              | 89.7(10)  |
|                       |          | O(2)#3-Al(3)-O(1)                                | 87.3(9)   |
|                       |          | O(2)-Al(3)-O(1)                                  | 92.7(9)   |
|                       |          | O(7)-Al(3)-O(1)                                  | 89.7(10)  |
|                       |          | O(7)#3-Al(3)-O(1)                                | 90.3(10)  |
|                       |          | O(1)#3-Al(3)-O(1)                                | 180.0     |
|                       |          | O(10)#4-Al(4)-O(10)#5                            | 180.0(19) |
|                       |          | O(10)#4-Al(4)-O(4)#5                             | 93.1(10)  |
|                       |          | O(10)#5-Al(4)-O(4)#5                             | 86.9(10)  |
|                       |          | O(10)#4-Al(4)-O(4)#4                             | 86.9(10)  |
|                       |          | O(10)#5-Al(4)-O(4)#4                             | 93.1(10)  |
|                       |          | O(4)#5-Al(4)-O(4)#4                              | 180.0     |
|                       |          | O(10)#4-Al(4)-O(8)#6                             | 93.6(13)  |
|                       |          | O(10)#5-Al(4)-O(8)#6                             | 86.4(13)  |
|                       |          | O(4)#5-Al(4)-O(8)#6                              | 92.2(11)  |
|                       |          | O(4)#4-Al(4)-O(8)#6                              | 87.8(11)  |
|                       |          | O(10)#4-Al(4)-O(8)                               | 86.4(13)  |
|                       |          | O(10)#5-Al(4)-O(8)                               | 93.6(13)  |
|                       |          | O(4)#5-Al(4)-O(8)                                | 87.8(11)  |
|                       |          | O(4)#4-Al(4)-O(8)                                | 92.2(11)  |
|                       |          | O(8)#6-Al(4)-O(8)                                | 180.0     |
| Ca[HPO <sub>3</sub> ] |          | Al <sub>3</sub> P <sub>6</sub> O <sub>19.5</sub> |           |
| Ca(1)- O(1)           | 2.298(2) | P(1)-O(3)                                        | 1.342(2)  |
| Ca(1)- O(3)           | 2.373(2) | P(1)-O(1)#1                                      | 1.515(2)  |
| Ca(1)- O(3)#1         | 2.404(2) | P(1)-O(1)#2                                      | 1.515(2)  |

|                       |            |                     |            |
|-----------------------|------------|---------------------|------------|
| Ca(1)- O(2)#2         | 2.414(2)   | P(1)-O(2)           | 1.538(4)   |
| Ca(1)- O(2)           | 2.429(2)   | Al(1)-O(1)#3        | 1.824(4)   |
| Ca(1)- O(1)#3         | 2.502(2)   | Al(1)-O(1)#4        | 1.821(2)   |
| Ca(1)- O(3)#4         | 2.704(3)   | Al(1)-O(1)#5        | 1.821(2)   |
| P(1)- O(1)#8          | 1.515(2)   | Al(1)-O(2)#6        | 1.981(2)   |
| P(1)- O(2)#9          | 1.517(2)   | Al(1)-O(2)          | 1.981(2)   |
| P(1)- O(3)            | 1.541(2)   | Al(1)-O(2)#7        | 1.983(9)   |
| O(1)- P(1)#11         | 1.515(2)   |                     |            |
| O(2)- P(1)#6          | 1.517(2)   |                     |            |
|                       |            | O(3)-P(1)-O(1)#1    | 108.2(8)   |
| O(1)- Ca(1)- O(3)     | 149.66(9)  | O(3)-P(1)-O(1)#2    | 108.2(8)   |
| O(1)- Ca(1)- O(3)#1   | 111.98(9)  | O(1)#1-P(1)-O(1)#2  | 114.06(17) |
| O(3)- Ca(1)- O(3)#1   | 95.99(6)   | O(3)-P(1)-O(2)      | 103.9(16)  |
| O(1)- Ca(1)- O(2)#2   | 81.32(9)   | O(1)#1-P(1)-O(2)    | 110.99(10) |
| O(3)- Ca(1)- O(2)#2   | 74.64(8)   | O(1)#2-P(1)-O(2)    | 110.99(10) |
| O(3)#1- Ca(1)- O(2)#2 | 161.39(9)  | O(1)#3-Al(1)-O(1)#4 | 97.99(10)  |
| O(1)- Ca(1)- O(2)     | 87.26(9)   | O(1)#3-Al(1)-O(1)#5 | 97.99(10)  |
| O(3)- Ca(1)- O(2)     | 89.60(9)   | O(1)#4-Al(1)-O(1)#5 | 97.99(10)  |
| O(3)#1- Ca(1)- O(2)   | 73.81(8)   | O(1)#3-Al(1)-O(2)#6 | 92.02(10)  |
| O(2)#2- Ca(1)- O(2)   | 121.27(9)  | O(1)#4-Al(1)-O(2)#6 | 164.88(11) |
| O(1)- Ca(1)- O(1)#3   | 122.34(7)  | O(1)#5-Al(1)-O(2)#6 | 91.78(10)  |
| O(3)- Ca(1)- O(1)#3   | 73.19(8)   | O(1)#3-Al(1)-O(2)   | 91.78(10)  |
| O(3)#1- Ca(1)- O(1)#3 | 78.71(8)   | O(1)#4-Al(1)-O(2)   | 92.02(10)  |
| O(2)#2- Ca(1)- O(1)#3 | 83.15(9)   | O(1)#5-Al(1)-O(2)   | 164.88(11) |
| O(2)- Ca(1)- O(1)#3   | 145.75(9)  | O(2)#6-Al(1)-O(2)   | 76.29(10)  |
| O(1)- Ca(1)- O(3)#4   | 70.57(8)   | O(1)#3-Al(1)-O(2)#7 | 164.88(11) |
| O(3)#1- Ca(1)- O(3)#4 | 129.65(7)  | O(1)#4-Al(1)-O(2)#7 | 91.78(10)  |
| O(3)#1- Ca(1)- O(3)#4 | 77.22(9)   | O(1)#5-Al(1)-O(2)#7 | 92.02(10)  |
| O(2)#2- Ca(1)- O(3)#4 | 96.19(8)   | O(2)#6-Al(1)-O(2)#7 | 76.29(10)  |
| O(2)- Ca(1)- O(3)#4   | 133.19(8)  | O(2)-Al(1)-O(2)#7   | 76.29(10)  |
| O(1)#3- Ca(1)- O(3)#4 | 56.50(7)   |                     |            |
| O(1)#8- P(1)-O(2)#9   | 115.69(15) |                     |            |
| O(1)#8- P(1)-O(3)     | 107.91(14) |                     |            |
| O(2)#9- P(1)-O(3)     | 114.31(15) |                     |            |

Al[P<sub>2</sub>O<sub>3</sub>(OH)<sub>3</sub>](H<sub>2</sub>O). Symmetry transformations used to generate equivalent atoms:

#1 -y+1, x-y, z; #2 -x+y+1, -x+1, z; #3 -y+1, x-y-1, z; #4 -x+y+2, -x+1, z; #5 -y+2, x-y, z; #6 -x+y+1, -x, z; #7 x+1, y-1, z; #8 x, y-1, z; #9 -y+2, x-y-1, z; #10 x, y+1, z; #11 x-1, y+1, z;

Al[(HPO<sub>3</sub>)(OH)](H<sub>2</sub>O). Symmetry transformations used to generate equivalent atoms:

#1 -x, -y, -z+3; #2 -x, -y+1, -z+2; #3 -x+1, -y+1, -z+2; #4 -x+1, -y, -z+2; #5 x, y, z-1; #6 -x+1, -y, -z+1; #7 x, y, z+1;

Ca[HPO<sub>3</sub>]. Symmetry transformations used to generate equivalent atoms:

#1 y+1/2, -x+3/2, z+1/4; #2 -y+3/2, x-1/2, z-1/4; #3 x+1/2, -y+1/2, -z+1/4; #4 x-1/2, -y+1/2, -z+1/4; #5 y, x-1, -z; #6 x-1/2, -y+3/2, -z+1/4; #7 -y+1, -x+1, -z+1/2; #8 x+1, y, z; #9 x+1/2, -y+3/2, -z+1/4; #10 y+1, x, -z; #11 x-1, y, z;

Al<sub>4</sub>P<sub>6</sub>O<sub>21</sub>. Symmetry transformations used to generate equivalent atoms:

#1 -y+1, x-y+1, -z+1/2; #2 -y+1, x-y+1, z; #3 y, -x+y, -z; #4 x-y+1, x, -z; #5 -x+1, -y+1, -z; #6 -x+y+1, -x+1, z; #7 -y+1, x-y, z; #8 x, y, -z+1/2; #9 -x+y, -x+1, z.

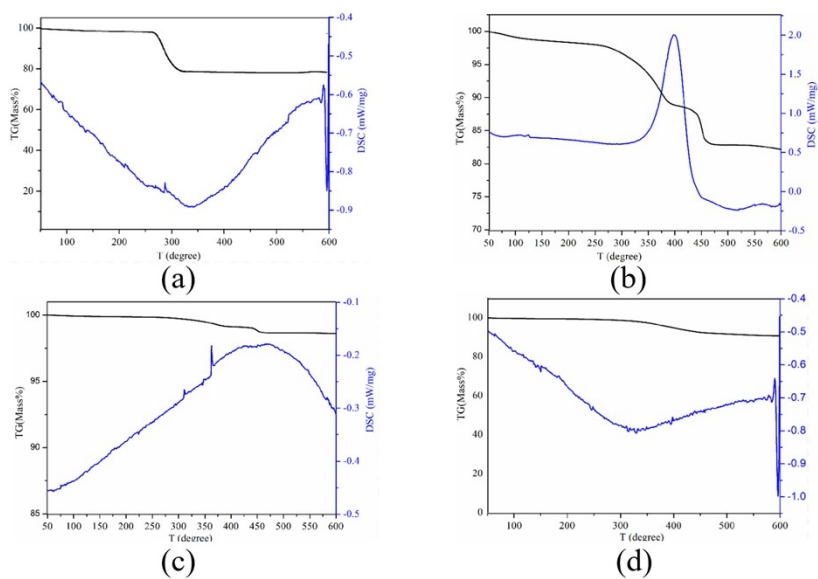

**Figure S6:** TG-DSC curves of  $\text{Al}[\text{P}_2\text{O}_3(\text{OH})_3](\text{H}_2\text{O})$  (a),  $\text{Al}[(\text{HPO}_3)(\text{OH})(\text{H}_2\text{O})]$  (b),  $\text{Ca}[\text{HPO}_3]$  (c) and  $\text{Al}_3\text{P}_6\text{O}_{19.5}$  (d).

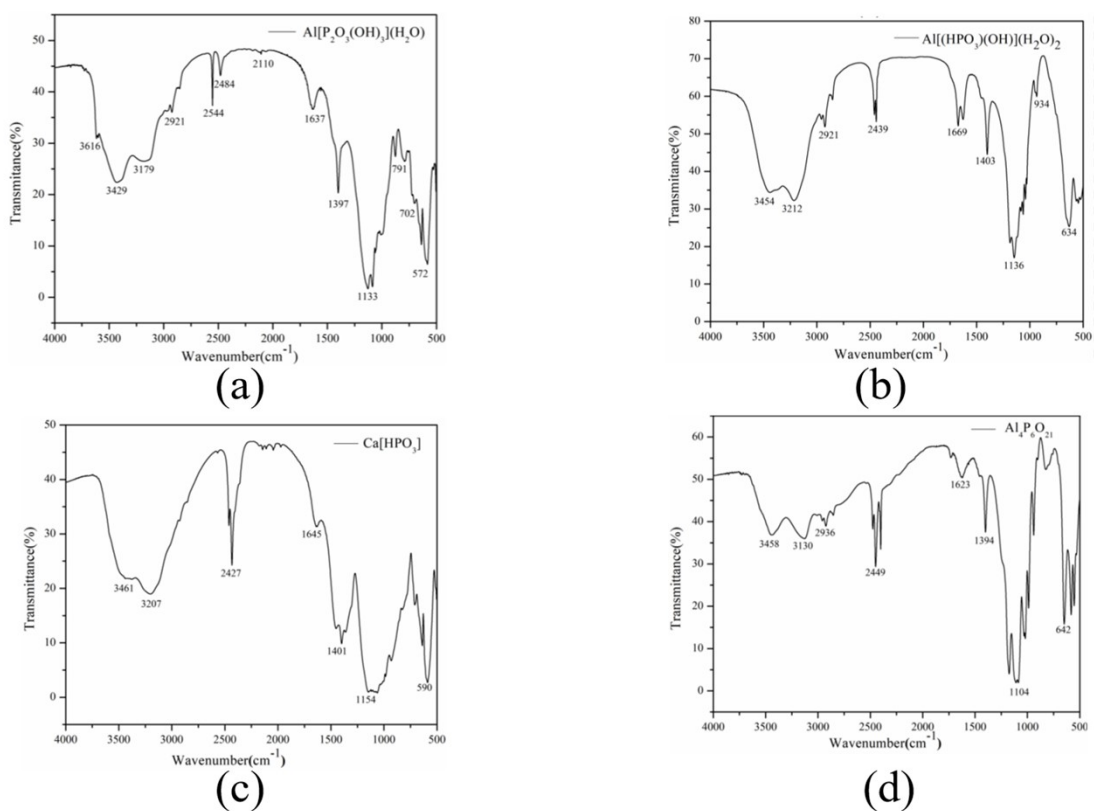

**Figure S7:** IR spectra of  $\text{Al}[\text{P}_2\text{O}_3(\text{OH})_3](\text{H}_2\text{O})$  (a),  $\text{Al}[(\text{HPO}_3)(\text{OH})(\text{H}_2\text{O})]$  (b),  $\text{Ca}[\text{HPO}_3]$  (c) and  $\text{Al}_3\text{P}_6\text{O}_{19.5}$  (d).

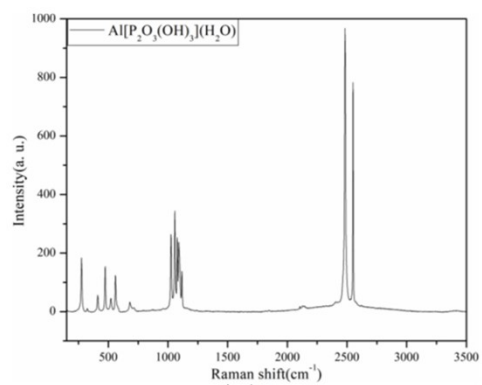

(a)

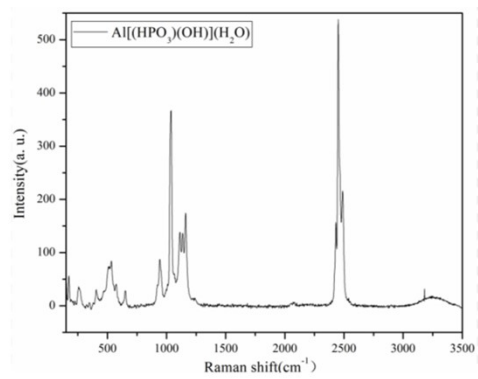

(b)

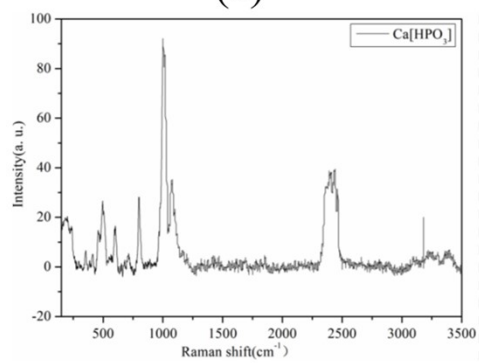

(c)

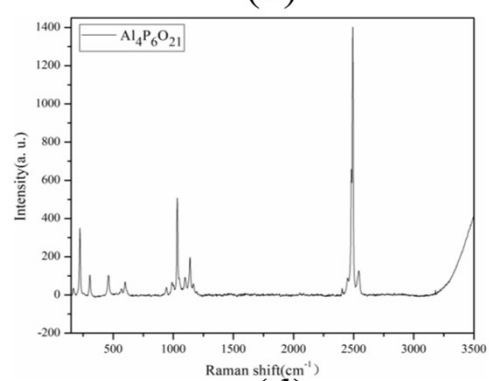

(d)

**Figure S8:** Raman spectra of  $\text{Al}[\text{P}_2\text{O}_3(\text{OH})_3](\text{H}_2\text{O})$  (a),  $\text{Al}[(\text{HPO}_3)(\text{OH})](\text{H}_2\text{O})$  (b),  $\text{Ca}[\text{HPO}_3]$  (c) and  $\text{Al}_3\text{P}_6\text{O}_{19.5}$  (d).
